# Supplementary material for: Mild reproductive impact of a Y chromosome deletion on a C57BL/6J substrain
Source: PubMed Central journal article supplement (PMC5442250; doi:10.1007/s00335-017-9680-0), 2017-03-10
Supplement: 335_2017_9680_MOESM1_ESM.pdf [file 335_2017_9680_MOESM1_ESM.pdf]

## Mild reproductive impact of a Y chromosome deletion on a C57BL/6J substrain

Megan M. MacBride, Adam Navis, Amar Dasari, and Ana V. Perez\*  
Taconic Biosciences, One Hudson City Centre, Hudson, NY 12534, USA

\*To whom correspondence should be addressed (email: ana.perez@taconic.com, phone: +1 518-697-3984 fax: +1 518-697-3910).

Mammalian Genome

Table S1. List of Primers used on Testes Expression Analysis

| Gene Name                                          | Chrom # | Forward                        | Reverse                       | Reverse 2             |
|----------------------------------------------------|---------|--------------------------------|-------------------------------|-----------------------|
| <i>Acrv1</i>                                       | 9       | TGAGTACACCACTTCC<br>AAGCA      | AAGCACATGTGTGGCA<br>ATTT      |                       |
| <i>Asty</i>                                        | Y       | GRGGAGTAGAACTCA<br>TCATC       | CAGGAGATGACTAACA<br>TAGCA     |                       |
| <i>β-actin</i>                                     | 5       | GGCACCACACCTTCTA<br>CAATG      | GTGGTGGTGAAGCTGT<br>AGCC      |                       |
| <i>Protamine 1</i>                                 | 16      | ACAAAATTCCACCTGC<br>TCACA      | GTTTTTCATCGGaCGGT<br>GGC      |                       |
| <i>Rbm31y</i><br>Genomic                           | Y       | TTTGGGATCGGCCAA<br>TATGC       | ACTTCCTCTCTTCCAA<br>CTGTC     |                       |
| <i>Rbm31y</i><br>Expression                        | Y       | AACCCAAATGCCTTC<br>GAGTC       | ACTTCCTCTCTTCCAA<br>CTGTC     |                       |
| <i>Sly</i> Global<br>( <i>Sly1</i> + <i>Sly2</i> ) | Y       | CATTTATAAGACGCTT<br>CACATAAAG  | TCCTCCATGATGGCTCT<br>TTC      | ATTCTCCATGATGGCTCTTTC |
| <i>Sly</i> Long<br>( <i>Sly1</i> only)             | Y       | GAAGACATGGGACAT<br>GAAGTAGG    | TCCTCCATGATGGCTCT<br>TTC      | ATTCTCCATGATGGCTCTTTC |
| <i>SSty1</i>                                       | Y       | AGAAGGATCCAGCTC<br>TCTATGCT    | CCAGTTACCAATCAACA<br>CATCAC   |                       |
| <i>SSty2</i>                                       | Y       | CAGGTGCCATTCTTAC<br>AGGACTAT   | ACCCAGGAACCTATTA<br>AGAAGTCAT |                       |
| <i>Zfy2</i>                                        | Y       | CTTAATTCCAGACATT<br>TTAACTTCCA | ATCACTTGTTCAAATG<br>TCCTACATT |                       |

**Note:** The primers 'Sly global' amplify the two *Sly* transcripts (*Sly1* and *Sly2*), while the primers 'Sly long' amplify only *Sly1*.

Table S2. List of STR Markers and their Y Chromosome positions

| STR Marker # | Position Mb | Present in B6NTac | Present in B6JBom |
|--------------|-------------|-------------------|-------------------|
| DYS101       | 0.19        | +                 | +                 |
| DYS101I      | 0.2         | +                 | +                 |
| DYS102       | 0.33        | +                 | +                 |
| DYS201       | 0.94        | +                 | +                 |
| DYS202       | 1.73        | +                 | +                 |
| DYS204       | 2.57        | +                 | +                 |
| DYS301       | 3.99        | +                 | +                 |
| DYS601       | 12.87       | +                 | -                 |
| DYS704       | 17.38       | +                 | -                 |
| DYS601I      | 17.58       | +                 | -                 |
| DYS1001I     | 18.38       | +                 | -                 |
| DYS1501I     | 35.69       | +                 | -                 |
| DYS1501II    | 36          | +                 | -                 |
| DYS1001      | 41.07       | +                 | -                 |
| DYS465I      | 46.6        | +                 | -                 |
| DYS465       | 46.7        | +                 | +                 |
| DYS1501      | 81.16       | +                 | +                 |

Table S3. Antibodies used for multiparametric flow cytometry analysis of spleen and bone marrow cells

| Tissue                                                                                                                                                                                  | Antigen combinations                   | Target cell populations                                                                                                                                                                                                                                                                                                                           |
|-----------------------------------------------------------------------------------------------------------------------------------------------------------------------------------------|----------------------------------------|---------------------------------------------------------------------------------------------------------------------------------------------------------------------------------------------------------------------------------------------------------------------------------------------------------------------------------------------------|
| <u>Bone Marrow:</u><br>CD11b <sup>FITC</sup> ,<br>CD19 <sup>PE</sup> ,<br>Ly6G <sup>PeCy7</sup><br>F4/80 <sup>PerCP</sup> ,<br>Ly6C <sup>APC</sup> ,<br>CD45 <sup>APC/Cy7</sup><br>DAPI | CD11b, Ly6G, Ly6C, F4/80               | <ul style="list-style-type: none"> <li>Total CD11b<sup>pos</sup>CD19<sup>neg</sup>CD45<sup>pos</sup> myeloid cell,</li> <li>CD11bLy6G<sup>pos</sup> – granulocytic population,</li> <li>CD11bLy6C<sup>pos</sup>Ly6G<sup>neg</sup> – monocytic lineage,</li> <li>CD11bF4/80<sup>pos</sup>/Ly6C<sup>neg</sup> – BM macrophages &amp; APC</li> </ul> |
|                                                                                                                                                                                         | CD19, CD11b, CD45                      | <ul style="list-style-type: none"> <li>Total CD19<sup>pos</sup> B lymphocytes,</li> <li>SSC<sup>int</sup>/CD19<sup>pos</sup>/CD45<sup>pos</sup> – plasma B cells,</li> <li>SSC<sup>int</sup>/CD19<sup>pos</sup>/CD45<sup>neg</sup> – abnormal B cells</li> </ul>                                                                                  |
|                                                                                                                                                                                         | CD45 <sup>pos</sup> Lin <sup>neg</sup> | <ul style="list-style-type: none"> <li>Total hematopoietic stem/progenitor cell (HPC)</li> </ul>                                                                                                                                                                                                                                                  |
| <u>Spleen:</u><br>CD11b <sup>FITC</sup> ,                                                                                                                                               | CD19, CD11b, CD45                      | <ul style="list-style-type: none"> <li>Total CD19<sup>pos</sup> B lymphocytes</li> </ul>                                                                                                                                                                                                                                                          |
|                                                                                                                                                                                         | CD3, CD8, CD4                          | <ul style="list-style-type: none"> <li>Total CD3<sup>pos</sup> T lymphocytes;</li> <li>CD3<sup>pos</sup>CD4<sup>pos</sup> – Th cells</li> <li>CD3<sup>pos</sup>CD8<sup>pos</sup> – cytotoxic T cells</li> </ul>                                                                                                                                   |

|                                                                                                                                            |                            |                                                                                                                                                                                                                                                         |
|--------------------------------------------------------------------------------------------------------------------------------------------|----------------------------|---------------------------------------------------------------------------------------------------------------------------------------------------------------------------------------------------------------------------------------------------------|
| CD19 <sup>PE</sup> ,<br>CD8 <sup>PeCy7</sup><br><br>CD11c <sup>PerCP</sup> ,<br>CD4 <sup>APC</sup> ,<br>CD3 <sup>APC/Cy7</sup><br><br>DAPI | CD11b, CD11c, CD3,<br>CD19 | <ul style="list-style-type: none"> <li>• CD11c<sup>pos</sup>CD11b<sup>int</sup>[CD3/CD19]<sup>neg</sup> – migratory dendritic cells;</li> <li>• CD11c<sup>pos</sup>CD11b<sup>neg</sup>[CD3neg/CD19]<sup>neg</sup> – resident dendritic cells</li> </ul> |
|--------------------------------------------------------------------------------------------------------------------------------------------|----------------------------|---------------------------------------------------------------------------------------------------------------------------------------------------------------------------------------------------------------------------------------------------------|

Table S4. NCBI Database Extract of Y chromosome genes between 6.12 Mb and 47.31 Mb

| Mouse Gene | Coding Region Position     | Description                                                 | UCSC link                                                                                                                                                                                                                                                                                                                                                                                                                                                                               |
|------------|----------------------------|-------------------------------------------------------------|-----------------------------------------------------------------------------------------------------------------------------------------------------------------------------------------------------------------------------------------------------------------------------------------------------------------------------------------------------------------------------------------------------------------------------------------------------------------------------------------|
| Rbm31y     | chrY:17,400,788-17,402,485 | RNA binding motif 31, Y-linked (Rbm31y), mRNA               | <a href="http://genome.ucsc.edu/cgi-bin/hgGene?hgg_gene=uc029xsd.1&amp;hgg_prot=Q9D3U4&amp;hgg_chrom=chrY&amp;hgg_start=17400760&amp;hgg_end=17402718&amp;hgg_type=knownGene&amp;db=mm10&amp;hgsid=500967801_Vakd6YZAzH49xqeBY7x8QEfmp51u">http://genome.ucsc.edu/cgi-bin/hgGene?hgg_gene=uc029xsd.1&amp;hgg_prot=Q9D3U4&amp;hgg_chrom=chrY&amp;hgg_start=17400760&amp;hgg_end=17402718&amp;hgg_type=knownGene&amp;db=mm10&amp;hgsid=500967801_Vakd6YZAzH49xqeBY7x8QEfmp51u</a>         |
| Rbm31y     | chrY:12,688,137-12,689,834 | RNA binding motif 31, Y-linked (Rbm31y), mRNA               | <a href="http://genome.ucsc.edu/cgi-bin/hgGene?hgg_gene=uc012hsj.1&amp;hgg_prot=Q9D3U4&amp;hgg_chrom=chrY&amp;hgg_start=12688109&amp;hgg_end=12690067&amp;hgg_type=knownGene&amp;db=mm10&amp;hgsid=500967801_Vakd6YZAzH49xqeBY7x8QEfmp51u">http://genome.ucsc.edu/cgi-bin/hgGene?hgg_gene=uc012hsj.1&amp;hgg_prot=Q9D3U4&amp;hgg_chrom=chrY&amp;hgg_start=12688109&amp;hgg_end=12690067&amp;hgg_type=knownGene&amp;db=mm10&amp;hgsid=500967801_Vakd6YZAzH49xqeBY7x8QEfmp51u</a>         |
| Sly        | chrY:38,775,333-38,799,352 | SAM and SH3 domain-containing protein 3                     | <a href="http://genome.ucsc.edu/cgi-bin/hgGene?hgg_gene=uc029xxu.1&amp;hgg_prot=A0A087WSR0&amp;hgg_chrom=chrY&amp;hgg_start=38774735&amp;hgg_end=38800793&amp;hgg_type=knownGene&amp;db=mm10&amp;hgsid=500967801_Vakd6YZAzH49xqeBY7x8QEfmp51u">http://genome.ucsc.edu/cgi-bin/hgGene?hgg_gene=uc029xxu.1&amp;hgg_prot=A0A087WSR0&amp;hgg_chrom=chrY&amp;hgg_start=38774735&amp;hgg_end=38800793&amp;hgg_type=knownGene&amp;db=mm10&amp;hgsid=500967801_Vakd6YZAzH49xqeBY7x8QEfmp51u</a> |
| Ssty1      | chrY:18,090,734-18,091,432 | spermiogenesis specific transcript on the Y 1 (Ssty1), mRNA | <a href="http://genome.ucsc.edu/cgi-bin/hgGene?hgg_gene=uc009vif.2&amp;hgg_prot=J3QPX2&amp;hgg_chrom=chrY&amp;hgg_start=18089166&amp;hgg_end=21097715&amp;hgg_type=knownGene&amp;db=mm10&amp;hgsid=500967801_Vakd6YZAzH49xqeBY7x8QEfmp51u">http://genome.ucsc.edu/cgi-bin/hgGene?hgg_gene=uc009vif.2&amp;hgg_prot=J3QPX2&amp;hgg_chrom=chrY&amp;hgg_start=18089166&amp;hgg_end=21097715&amp;hgg_type=knownGene&amp;db=mm10&amp;hgsid=500967801_Vakd6YZAzH49xqeBY7x8QEfmp51u</a>         |
| Ssty1      | chrY:13,377,980-13,378,678 | spermiogenesis specific transcript on the Y 1 (Ssty1), mRNA | <a href="http://genome.ucsc.edu/cgi-bin/hgGene?hgg_gene=uc029xsa.1&amp;hgg_prot=J3QPX2&amp;hgg_chrom=chrY&amp;hgg_start=13376412&amp;hgg_end=13378797&amp;hgg_type=knownGene&amp;db=mm10&amp;hgsid=500967801_Vakd6YZAzH49xqeBY7x8QEfmp51u">http://genome.ucsc.edu/cgi-bin/hgGene?hgg_gene=uc029xsa.1&amp;hgg_prot=J3QPX2&amp;hgg_chrom=chrY&amp;hgg_start=13376412&amp;hgg_end=13378797&amp;hgg_type=knownGene&amp;db=mm10&amp;hgsid=500967801_Vakd6YZAzH49xqeBY7x8QEfmp51u</a>         |
| Ssty2      | chrY:22,513,860-22,514,543 | spermiogenesis specific transcript on the Y 2 (Ssty2), mRNA | <a href="http://genome.ucsc.edu/cgi-bin/hgGene?hgg_gene=uc029xso.1&amp;hgg_prot=Q149W4&amp;hgg_chrom=chrY&amp;hgg_start=22512350&amp;hgg_end=22514683&amp;hgg_type=knownGene&amp;db=mm10&amp;hgsid=500967801_Vakd6YZAzH49xqeBY7x8QEfmp51u">http://genome.ucsc.edu/cgi-bin/hgGene?hgg_gene=uc029xso.1&amp;hgg_prot=Q149W4&amp;hgg_chrom=chrY&amp;hgg_start=22512350&amp;hgg_end=22514683&amp;hgg_type=knownGene&amp;db=mm10&amp;hgsid=500967801_Vakd6YZAzH49xqeBY7x8QEfmp51u</a>         |

|          |                                    |                                                                                                  |                                                                                                                                                                                                                                                                                                                                                                                                                                                                     |
|----------|------------------------------------|--------------------------------------------------------------------------------------------------|---------------------------------------------------------------------------------------------------------------------------------------------------------------------------------------------------------------------------------------------------------------------------------------------------------------------------------------------------------------------------------------------------------------------------------------------------------------------|
| AB335742 | chrY:43,26<br>5,812-<br>43,265,855 | non-coding<br>RNA,<br>oocyte_clustere<br>d_small_RNA9<br>43, complete<br>sequence                | <a href="http://genome.ucsc.edu/cgi-bin/hgGene?hgg_gene=uc029xye.1&amp;hgg_prot=&amp;hgg_chrom=chrY&amp;hgg_start=43265811&amp;hgg_end=43265855&amp;hgg_type=knownGene&amp;db=mm10&amp;hgsid=500967801_Vakd6YZAzH49xqeBY7x8QEfmp51u">http://genome.ucsc.edu/cgi-bin/hgGene?hgg_gene=uc029xye.1&amp;hgg_prot=&amp;hgg_chrom=chrY&amp;hgg_start=43265811&amp;hgg_end=43265855&amp;hgg_type=knownGene&amp;db=mm10&amp;hgsid=500967801_Vakd6YZAzH49xqeBY7x8QEfmp51u</a> |
| AB335742 | chrY:40,53<br>4,264-<br>40,534,307 | non-coding<br>RNA,<br>oocyte_clustere<br>d_small_RNA9<br>43, complete<br>sequence                | <a href="http://genome.ucsc.edu/cgi-bin/hgGene?hgg_gene=uc029xxv.1&amp;hgg_prot=&amp;hgg_chrom=chrY&amp;hgg_start=40534263&amp;hgg_end=40534307&amp;hgg_type=knownGene&amp;db=mm10&amp;hgsid=500967801_Vakd6YZAzH49xqeBY7x8QEfmp51u">http://genome.ucsc.edu/cgi-bin/hgGene?hgg_gene=uc029xxv.1&amp;hgg_prot=&amp;hgg_chrom=chrY&amp;hgg_start=40534263&amp;hgg_end=40534307&amp;hgg_type=knownGene&amp;db=mm10&amp;hgsid=500967801_Vakd6YZAzH49xqeBY7x8QEfmp51u</a> |
| AB349653 | chrY:18,89<br>5,613-<br>18,895,656 | non-coding<br>RNA,<br>oocyte_piRNA<br>469, complete<br>sequence                                  | <a href="http://genome.ucsc.edu/cgi-bin/hgGene?hgg_gene=uc029xse.1&amp;hgg_prot=&amp;hgg_chrom=chrY&amp;hgg_start=18895612&amp;hgg_end=18895656&amp;hgg_type=knownGene&amp;db=mm10&amp;hgsid=500967801_Vakd6YZAzH49xqeBY7x8QEfmp51u">http://genome.ucsc.edu/cgi-bin/hgGene?hgg_gene=uc029xse.1&amp;hgg_prot=&amp;hgg_chrom=chrY&amp;hgg_start=18895612&amp;hgg_end=18895656&amp;hgg_type=knownGene&amp;db=mm10&amp;hgsid=500967801_Vakd6YZAzH49xqeBY7x8QEfmp51u</a> |
| AB349653 | chrY:14,18<br>3,345-<br>14,183,388 | non-coding<br>RNA,<br>oocyte_piRNA<br>469, complete<br>sequence                                  | <a href="http://genome.ucsc.edu/cgi-bin/hgGene?hgg_gene=uc029xsb.1&amp;hgg_prot=&amp;hgg_chrom=chrY&amp;hgg_start=14183344&amp;hgg_end=14183388&amp;hgg_type=knownGene&amp;db=mm10&amp;hgsid=500967801_Vakd6YZAzH49xqeBY7x8QEfmp51u">http://genome.ucsc.edu/cgi-bin/hgGene?hgg_gene=uc029xsb.1&amp;hgg_prot=&amp;hgg_chrom=chrY&amp;hgg_start=14183344&amp;hgg_end=14183388&amp;hgg_type=knownGene&amp;db=mm10&amp;hgsid=500967801_Vakd6YZAzH49xqeBY7x8QEfmp51u</a> |
| AB349653 | chrY:14,18<br>3,345-<br>14,183,388 | non-coding<br>RNA,<br>oocyte_piRNA<br>469, complete<br>sequence                                  | <a href="http://genome.ucsc.edu/cgi-bin/hgGene?hgg_gene=uc029xsb.1&amp;hgg_prot=&amp;hgg_chrom=chrY&amp;hgg_start=14183344&amp;hgg_end=14183388&amp;hgg_type=knownGene&amp;db=mm10&amp;hgsid=500967801_Vakd6YZAzH49xqeBY7x8QEfmp51u">http://genome.ucsc.edu/cgi-bin/hgGene?hgg_gene=uc029xsb.1&amp;hgg_prot=&amp;hgg_chrom=chrY&amp;hgg_start=14183344&amp;hgg_end=14183388&amp;hgg_type=knownGene&amp;db=mm10&amp;hgsid=500967801_Vakd6YZAzH49xqeBY7x8QEfmp51u</a> |
| AK006653 | chrY:15,15<br>5,239-<br>15,178,893 | adult male<br>testis cDNA,<br>RIKEN full-<br>length enriched<br>library,<br>clone:1700040<br>F15 | <a href="http://genome.ucsc.edu/cgi-bin/hgGene?hgg_gene=uc009vft.1&amp;hgg_prot=&amp;hgg_chrom=chrY&amp;hgg_start=15155238&amp;hgg_end=15178893&amp;hgg_type=knownGene&amp;db=mm10&amp;hgsid=500967801_Vakd6YZAzH49xqeBY7x8QEfmp51u">http://genome.ucsc.edu/cgi-bin/hgGene?hgg_gene=uc009vft.1&amp;hgg_prot=&amp;hgg_chrom=chrY&amp;hgg_start=15155238&amp;hgg_end=15178893&amp;hgg_type=knownGene&amp;db=mm10&amp;hgsid=500967801_Vakd6YZAzH49xqeBY7x8QEfmp51u</a> |
| AK006653 | chrY:15,15<br>5,239-<br>15,178,893 | adult male<br>testis cDNA,<br>RIKEN full-<br>length enriched<br>library,<br>clone:1700040<br>F15 | <a href="http://genome.ucsc.edu/cgi-bin/hgGene?hgg_gene=uc009vft.1&amp;hgg_prot=&amp;hgg_chrom=chrY&amp;hgg_start=15155238&amp;hgg_end=15178893&amp;hgg_type=knownGene&amp;db=mm10&amp;hgsid=500967801_Vakd6YZAzH49xqeBY7x8QEfmp51u">http://genome.ucsc.edu/cgi-bin/hgGene?hgg_gene=uc009vft.1&amp;hgg_prot=&amp;hgg_chrom=chrY&amp;hgg_start=15155238&amp;hgg_end=15178893&amp;hgg_type=knownGene&amp;db=mm10&amp;hgsid=500967801_Vakd6YZAzH49xqeBY7x8QEfmp51u</a> |
| DQ874391 | chrY:45,87<br>4,035-<br>45,876,398 | amplified<br>spermatogenic<br>transcript Y-<br>encoded                                           | <a href="http://genome.ucsc.edu/cgi-bin/hgGene?hgg_gene=uc029xza.1&amp;hgg_prot=&amp;hgg_chrom=chrY&amp;hgg_start=45874034&amp;hgg_end=45876398&amp;hgg_type=knownGene&amp;db=mm10&amp;hgsid=500967801_Vakd6YZAzH49xqeBY7x8QEfmp51u">http://genome.ucsc.edu/cgi-bin/hgGene?hgg_gene=uc029xza.1&amp;hgg_prot=&amp;hgg_chrom=chrY&amp;hgg_start=45874034&amp;hgg_end=45876398&amp;hgg_type=knownGene&amp;db=mm10&amp;hgsid=500967801_Vakd6YZAzH49xqeBY7x8QEfmp51u</a> |

|          |                                    |                                                               |                                                                                                                                                                                                                                                                                                                                                                                                                                                                                         |
|----------|------------------------------------|---------------------------------------------------------------|-----------------------------------------------------------------------------------------------------------------------------------------------------------------------------------------------------------------------------------------------------------------------------------------------------------------------------------------------------------------------------------------------------------------------------------------------------------------------------------------|
|          |                                    | mRNA sequence                                                 |                                                                                                                                                                                                                                                                                                                                                                                                                                                                                         |
| DQ874391 | chrY:42,85<br>6,094-<br>42,858,456 | amplified spermatogenic transcript Y-encoded mRNA sequence    | <a href="http://genome.ucsc.edu/cgi-bin/hgGene?hgg_gene=uc009vfy.1&amp;hgg_prot=&amp;hgg_chrom=chrY&amp;hgg_start=42856093&amp;hgg_end=42858456&amp;hgg_type=knownGene&amp;db=mm10&amp;hgsid=500967801_Vakd6YZAzH49xqeBY7x8QEfmp51u">http://genome.ucsc.edu/cgi-bin/hgGene?hgg_gene=uc009vfy.1&amp;hgg_prot=&amp;hgg_chrom=chrY&amp;hgg_start=42856093&amp;hgg_end=42858456&amp;hgg_type=knownGene&amp;db=mm10&amp;hgsid=500967801_Vakd6YZAzH49xqeBY7x8QEfmp51u</a>                     |
| DQ874391 | chrY:31,29<br>0,381-<br>31,292,742 | amplified spermatogenic transcript Y-encoded mRNA sequence    | <a href="http://genome.ucsc.edu/cgi-bin/hgGene?hgg_gene=uc029xux.1&amp;hgg_prot=&amp;hgg_chrom=chrY&amp;hgg_start=31290380&amp;hgg_end=31292742&amp;hgg_type=knownGene&amp;db=mm10&amp;hgsid=500967801_Vakd6YZAzH49xqeBY7x8QEfmp51u">http://genome.ucsc.edu/cgi-bin/hgGene?hgg_gene=uc029xux.1&amp;hgg_prot=&amp;hgg_chrom=chrY&amp;hgg_start=31290380&amp;hgg_end=31292742&amp;hgg_type=knownGene&amp;db=mm10&amp;hgsid=500967801_Vakd6YZAzH49xqeBY7x8QEfmp51u</a>                     |
| DQ874391 | chrY:30,42<br>3,567-<br>30,425,930 | amplified spermatogenic transcript Y-encoded mRNA sequence    | <a href="http://genome.ucsc.edu/cgi-bin/hgGene?hgg_gene=uc009vhs.1&amp;hgg_prot=&amp;hgg_chrom=chrY&amp;hgg_start=30423566&amp;hgg_end=30425930&amp;hgg_type=knownGene&amp;db=mm10&amp;hgsid=500967801_Vakd6YZAzH49xqeBY7x8QEfmp51u">http://genome.ucsc.edu/cgi-bin/hgGene?hgg_gene=uc009vhs.1&amp;hgg_prot=&amp;hgg_chrom=chrY&amp;hgg_start=30423566&amp;hgg_end=30425930&amp;hgg_type=knownGene&amp;db=mm10&amp;hgsid=500967801_Vakd6YZAzH49xqeBY7x8QEfmp51u</a>                     |
| FJ541075 | chrY:46,48<br>1,356-<br>46,536,969 | piRNA piRY splice variant 1, precursor RNA, partial sequence  | <a href="http://genome.ucsc.edu/cgi-bin/hgGene?hgg_gene=uc029xzb.1&amp;hgg_prot=&amp;hgg_chrom=chrY&amp;hgg_start=46481355&amp;hgg_end=46536969&amp;hgg_type=knownGene&amp;db=mm10&amp;hgsid=500967801_Vakd6YZAzH49xqeBY7x8QEfmp51u">http://genome.ucsc.edu/cgi-bin/hgGene?hgg_gene=uc029xzb.1&amp;hgg_prot=&amp;hgg_chrom=chrY&amp;hgg_start=46481355&amp;hgg_end=46536969&amp;hgg_type=knownGene&amp;db=mm10&amp;hgsid=500967801_Vakd6YZAzH49xqeBY7x8QEfmp51u</a>                     |
| FJ541078 | chrY:19,86<br>8,054-<br>19,891,496 | piRNA piRY splice variant 4, precursor RNA, partial sequence  | <a href="http://genome.ucsc.edu/cgi-bin/hgGene?hgg_gene=uc029xsf.1&amp;hgg_prot=&amp;hgg_chrom=chrY&amp;hgg_start=19868053&amp;hgg_end=19891496&amp;hgg_type=knownGene&amp;db=mm10&amp;hgsid=500967801_Vakd6YZAzH49xqeBY7x8QEfmp51u">http://genome.ucsc.edu/cgi-bin/hgGene?hgg_gene=uc029xsf.1&amp;hgg_prot=&amp;hgg_chrom=chrY&amp;hgg_start=19868053&amp;hgg_end=19891496&amp;hgg_type=knownGene&amp;db=mm10&amp;hgsid=500967801_Vakd6YZAzH49xqeBY7x8QEfmp51u</a>                     |
| FJ541087 | chrY:20,69<br>7,597-<br>20,753,364 | piRNA piRY splice variant 13, precursor RNA, partial sequence | <a href="http://genome.ucsc.edu/cgi-bin/hgGene?hgg_gene=uc029xsh.1&amp;hgg_prot=&amp;hgg_chrom=chrY&amp;hgg_start=20697596&amp;hgg_end=20753364&amp;hgg_type=knownGene&amp;db=mm10&amp;hgsid=500967801_Vakd6YZAzH49xqeBY7x8QEfmp51u">http://genome.ucsc.edu/cgi-bin/hgGene?hgg_gene=uc029xsh.1&amp;hgg_prot=&amp;hgg_chrom=chrY&amp;hgg_start=20697596&amp;hgg_end=20753364&amp;hgg_type=knownGene&amp;db=mm10&amp;hgsid=500967801_Vakd6YZAzH49xqeBY7x8QEfmp51u</a>                     |
| FJ541095 | chrY:43,11<br>7,378-<br>43,173,007 | piRNA piRY splice variant 21, precursor RNA, partial sequence | <a href="http://genome.ucsc.edu/cgi-bin/hgGene?hgg_gene=uc029xyb.1&amp;hgg_prot=&amp;hgg_chrom=chrY&amp;hgg_start=43117377&amp;hgg_end=43173007&amp;hgg_type=knownGene&amp;db=mm10&amp;hgsid=500967801_Vakd6YZAzH49xqeBY7x8QEfmp51u">http://genome.ucsc.edu/cgi-bin/hgGene?hgg_gene=uc029xyb.1&amp;hgg_prot=&amp;hgg_chrom=chrY&amp;hgg_start=43117377&amp;hgg_end=43173007&amp;hgg_type=knownGene&amp;db=mm10&amp;hgsid=500967801_Vakd6YZAzH49xqeBY7x8QEfmp51u</a>                     |
| FJ541095 | chrY:42,53<br>3,944-<br>42,568,599 | piRNA piRY splice variant 21, precursor RNA, partial sequence | <a href="http://genome.ucsc.edu/cgi-bin/hgGene?hgg_gene=uc029xxw.1&amp;hgg_prot=A0A087WNW5&amp;hgg_chrom=chrY&amp;hgg_start=42533932&amp;hgg_end=42582060&amp;hgg_type=knownGene&amp;db=mm10&amp;hgsid=500967801_Vakd6YZAzH49xqeBY7x8QEfmp51u">http://genome.ucsc.edu/cgi-bin/hgGene?hgg_gene=uc029xxw.1&amp;hgg_prot=A0A087WNW5&amp;hgg_chrom=chrY&amp;hgg_start=42533932&amp;hgg_end=42582060&amp;hgg_type=knownGene&amp;db=mm10&amp;hgsid=500967801_Vakd6YZAzH49xqeBY7x8QEfmp51u</a> |

|         |                                    |                                                |                                                                                                                                                                                                                                                                                                                                                                                                                                                                                         |
|---------|------------------------------------|------------------------------------------------|-----------------------------------------------------------------------------------------------------------------------------------------------------------------------------------------------------------------------------------------------------------------------------------------------------------------------------------------------------------------------------------------------------------------------------------------------------------------------------------------|
| Gm20736 | chrY:28,24<br>5,548-<br>28,270,080 | predicted gene,<br>20736<br>(Gm20736),<br>mRNA | <a href="http://genome.ucsc.edu/cgi-bin/hgGene?hgg_gene=uc029xte.1&amp;hgg_prot=A0A087WSR0&amp;hgg_chrom=chrY&amp;hgg_start=28245356&amp;hgg_end=28271524&amp;hgg_type=knownGene&amp;db=mm10&amp;hgsid=500967801_Vakd6YZAzH49xqeBY7x8QEfmp51u">http://genome.ucsc.edu/cgi-bin/hgGene?hgg_gene=uc029xte.1&amp;hgg_prot=A0A087WSR0&amp;hgg_chrom=chrY&amp;hgg_start=28245356&amp;hgg_end=28271524&amp;hgg_type=knownGene&amp;db=mm10&amp;hgsid=500967801_Vakd6YZAzH49xqeBY7x8QEfmp51u</a> |
| Gm20736 | chrY:22,83<br>5,282-<br>22,859,834 | predicted gene,<br>20736<br>(Gm20736),<br>mRNA | <a href="http://genome.ucsc.edu/cgi-bin/hgGene?hgg_gene=uc029xsp.1&amp;hgg_prot=J3QNV4&amp;hgg_chrom=chrY&amp;hgg_start=22835090&amp;hgg_end=22861268&amp;hgg_type=knownGene&amp;db=mm10&amp;hgsid=500967801_Vakd6YZAzH49xqeBY7x8QEfmp51u">http://genome.ucsc.edu/cgi-bin/hgGene?hgg_gene=uc029xsp.1&amp;hgg_prot=J3QNV4&amp;hgg_chrom=chrY&amp;hgg_start=22835090&amp;hgg_end=22861268&amp;hgg_type=knownGene&amp;db=mm10&amp;hgsid=500967801_Vakd6YZAzH49xqeBY7x8QEfmp51u</a>         |
| Gm20736 | chrY:20,96<br>7,673-<br>20,992,230 | predicted gene,<br>20736<br>(Gm20736),<br>mRNA | <a href="http://genome.ucsc.edu/cgi-bin/hgGene?hgg_gene=uc029xsl.1&amp;hgg_prot=A0A087WSR0&amp;hgg_chrom=chrY&amp;hgg_start=20967481&amp;hgg_end=20993669&amp;hgg_type=knownGene&amp;db=mm10&amp;hgsid=500967801_Vakd6YZAzH49xqeBY7x8QEfmp51u">http://genome.ucsc.edu/cgi-bin/hgGene?hgg_gene=uc029xsl.1&amp;hgg_prot=A0A087WSR0&amp;hgg_chrom=chrY&amp;hgg_start=20967481&amp;hgg_end=20993669&amp;hgg_type=knownGene&amp;db=mm10&amp;hgsid=500967801_Vakd6YZAzH49xqeBY7x8QEfmp51u</a> |
| Gm20747 | chrY:21,16<br>6,083-<br>21,166,766 | predicted gene,<br>20747<br>(Gm20747),<br>mRNA | <a href="http://genome.ucsc.edu/cgi-bin/hgGene?hgg_gene=uc029xsm.1&amp;hgg_prot=Q5FWB5&amp;hgg_chrom=chrY&amp;hgg_start=21164553&amp;hgg_end=21166898&amp;hgg_type=knownGene&amp;db=mm10&amp;hgsid=500967801_Vakd6YZAzH49xqeBY7x8QEfmp51u">http://genome.ucsc.edu/cgi-bin/hgGene?hgg_gene=uc029xsm.1&amp;hgg_prot=Q5FWB5&amp;hgg_chrom=chrY&amp;hgg_start=21164553&amp;hgg_end=21166898&amp;hgg_type=knownGene&amp;db=mm10&amp;hgsid=500967801_Vakd6YZAzH49xqeBY7x8QEfmp51u</a>         |
| Gm20806 | chrY:27,69<br>2,628-<br>27,693,311 | predicted gene,<br>20806<br>(Gm20806),<br>mRNA | <a href="http://genome.ucsc.edu/cgi-bin/hgGene?hgg_gene=uc029xtd.1&amp;hgg_prot=Q9D9T3&amp;hgg_chrom=chrY&amp;hgg_start=27691135&amp;hgg_end=27693439&amp;hgg_type=knownGene&amp;db=mm10&amp;hgsid=500967801_Vakd6YZAzH49xqeBY7x8QEfmp51u">http://genome.ucsc.edu/cgi-bin/hgGene?hgg_gene=uc029xtd.1&amp;hgg_prot=Q9D9T3&amp;hgg_chrom=chrY&amp;hgg_start=27691135&amp;hgg_end=27693439&amp;hgg_type=knownGene&amp;db=mm10&amp;hgsid=500967801_Vakd6YZAzH49xqeBY7x8QEfmp51u</a>         |
| Gm20806 | chrY:26,94<br>7,544-<br>26,948,227 | predicted gene,<br>20806<br>(Gm20806),<br>mRNA | <a href="http://genome.ucsc.edu/cgi-bin/hgGene?hgg_gene=uc029xtc.1&amp;hgg_prot=Q9D9T3&amp;hgg_chrom=chrY&amp;hgg_start=26946051&amp;hgg_end=26948355&amp;hgg_type=knownGene&amp;db=mm10&amp;hgsid=500967801_Vakd6YZAzH49xqeBY7x8QEfmp51u">http://genome.ucsc.edu/cgi-bin/hgGene?hgg_gene=uc029xtc.1&amp;hgg_prot=Q9D9T3&amp;hgg_chrom=chrY&amp;hgg_start=26946051&amp;hgg_end=26948355&amp;hgg_type=knownGene&amp;db=mm10&amp;hgsid=500967801_Vakd6YZAzH49xqeBY7x8QEfmp51u</a>         |
| Gm20809 | chrY:25,99<br>5,821-<br>25,996,504 | predicted gene,<br>20809<br>(Gm20809),<br>mRNA | <a href="http://genome.ucsc.edu/cgi-bin/hgGene?hgg_gene=uc029xta.1&amp;hgg_prot=Q62458&amp;hgg_chrom=chrY&amp;hgg_start=25995643&amp;hgg_end=25996635&amp;hgg_type=knownGene&amp;db=mm10&amp;hgsid=500967801_Vakd6YZAzH49xqeBY7x8QEfmp51u">http://genome.ucsc.edu/cgi-bin/hgGene?hgg_gene=uc029xta.1&amp;hgg_prot=Q62458&amp;hgg_chrom=chrY&amp;hgg_start=25995643&amp;hgg_end=25996635&amp;hgg_type=knownGene&amp;db=mm10&amp;hgsid=500967801_Vakd6YZAzH49xqeBY7x8QEfmp51u</a>         |
| Gm20809 | chrY:25,48<br>2,701-<br>25,483,384 | predicted gene,<br>20809<br>(Gm20809),<br>mRNA | <a href="http://genome.ucsc.edu/cgi-bin/hgGene?hgg_gene=uc029xsy.1&amp;hgg_prot=Q62458&amp;hgg_chrom=chrY&amp;hgg_start=25482523&amp;hgg_end=25483515&amp;hgg_type=knownGene&amp;db=mm10&amp;hgsid=500967801_Vakd6YZAzH49xqeBY7x8QEfmp51u">http://genome.ucsc.edu/cgi-bin/hgGene?hgg_gene=uc029xsy.1&amp;hgg_prot=Q62458&amp;hgg_chrom=chrY&amp;hgg_start=25482523&amp;hgg_end=25483515&amp;hgg_type=knownGene&amp;db=mm10&amp;hgsid=500967801_Vakd6YZAzH49xqeBY7x8QEfmp51u</a>         |
| Gm20809 | chrY:24,96<br>9,606-<br>24,970,289 | predicted gene,<br>20809<br>(Gm20809),<br>mRNA | <a href="http://genome.ucsc.edu/cgi-bin/hgGene?hgg_gene=uc029xsw.1&amp;hgg_prot=Q62458&amp;hgg_chrom=chrY&amp;hgg_start=24969428&amp;hgg_end=24970420&amp;hgg_type=knownGene&amp;db=mm10&amp;hgsid=500967801_Vakd6YZAzH49xqeBY7x8QEfmp51u">http://genome.ucsc.edu/cgi-bin/hgGene?hgg_gene=uc029xsw.1&amp;hgg_prot=Q62458&amp;hgg_chrom=chrY&amp;hgg_start=24969428&amp;hgg_end=24970420&amp;hgg_type=knownGene&amp;db=mm10&amp;hgsid=500967801_Vakd6YZAzH49xqeBY7x8QEfmp51u</a>         |

|         |                                    |                                                |                                                                                                                                                                                                                                                                                                                                                                                                                                                                                 |
|---------|------------------------------------|------------------------------------------------|---------------------------------------------------------------------------------------------------------------------------------------------------------------------------------------------------------------------------------------------------------------------------------------------------------------------------------------------------------------------------------------------------------------------------------------------------------------------------------|
| Gm20809 | chrY:24,45<br>6,582-<br>24,457,265 | predicted gene,<br>20809<br>(Gm20809),<br>mRNA | <a href="http://genome.ucsc.edu/cgi-bin/hgGene?hgg_gene=uc029xsu.1&amp;hgg_prot=Q62458&amp;hgg_chrom=chrY&amp;hgg_start=24456404&amp;hgg_end=24457396&amp;hgg_type=knownGene&amp;db=mm10&amp;hgsid=500967801_Vakd6YZAzH49xqeBY7x8QEfmp51u">http://genome.ucsc.edu/cgi-bin/hgGene?hgg_gene=uc029xsu.1&amp;hgg_prot=Q62458&amp;hgg_chrom=chrY&amp;hgg_start=24456404&amp;hgg_end=24457396&amp;hgg_type=knownGene&amp;db=mm10&amp;hgsid=500967801_Vakd6YZAzH49xqeBY7x8QEfmp51u</a> |
| Gm20809 | chrY:23,94<br>3,343-<br>23,944,026 | predicted gene,<br>20809<br>(Gm20809),<br>mRNA | <a href="http://genome.ucsc.edu/cgi-bin/hgGene?hgg_gene=uc029xss.1&amp;hgg_prot=Q62458&amp;hgg_chrom=chrY&amp;hgg_start=23943165&amp;hgg_end=23944157&amp;hgg_type=knownGene&amp;db=mm10&amp;hgsid=500967801_Vakd6YZAzH49xqeBY7x8QEfmp51u">http://genome.ucsc.edu/cgi-bin/hgGene?hgg_gene=uc029xss.1&amp;hgg_prot=Q62458&amp;hgg_chrom=chrY&amp;hgg_start=23943165&amp;hgg_end=23944157&amp;hgg_type=knownGene&amp;db=mm10&amp;hgsid=500967801_Vakd6YZAzH49xqeBY7x8QEfmp51u</a> |
| Gm20815 | chrY:8,832<br>,956-<br>8,833,639   | predicted gene,<br>20815<br>(Gm20815),<br>mRNA | <a href="http://genome.ucsc.edu/cgi-bin/hgGene?hgg_gene=uc012hti.1&amp;hgg_prot=J3KMI0&amp;hgg_chrom=chrY&amp;hgg_start=8832248&amp;hgg_end=8835169&amp;hgg_type=knownGene&amp;db=mm10&amp;hgsid=500967801_Vakd6YZAzH49xqeBY7x8QEfmp51u">http://genome.ucsc.edu/cgi-bin/hgGene?hgg_gene=uc012hti.1&amp;hgg_prot=J3KMI0&amp;hgg_chrom=chrY&amp;hgg_start=8832248&amp;hgg_end=8835169&amp;hgg_type=knownGene&amp;db=mm10&amp;hgsid=500967801_Vakd6YZAzH49xqeBY7x8QEfmp51u</a>     |
| Gm20822 | chrY:15,88<br>2,559-<br>15,883,245 | predicted gene,<br>20822<br>(Gm20822),<br>mRNA | <a href="http://genome.ucsc.edu/cgi-bin/hgGene?hgg_gene=uc012hsg.1&amp;hgg_prot=J3KMI7&amp;hgg_chrom=chrY&amp;hgg_start=15882558&amp;hgg_end=15883245&amp;hgg_type=knownGene&amp;db=mm10&amp;hgsid=500967801_Vakd6YZAzH49xqeBY7x8QEfmp51u">http://genome.ucsc.edu/cgi-bin/hgGene?hgg_gene=uc012hsg.1&amp;hgg_prot=J3KMI7&amp;hgg_chrom=chrY&amp;hgg_start=15882558&amp;hgg_end=15883245&amp;hgg_type=knownGene&amp;db=mm10&amp;hgsid=500967801_Vakd6YZAzH49xqeBY7x8QEfmp51u</a> |
| Gm20822 | chrY:15,88<br>2,559-<br>15,883,245 | predicted gene,<br>20822<br>(Gm20822),<br>mRNA | <a href="http://genome.ucsc.edu/cgi-bin/hgGene?hgg_gene=uc012hsg.1&amp;hgg_prot=J3KMI7&amp;hgg_chrom=chrY&amp;hgg_start=15882558&amp;hgg_end=15883245&amp;hgg_type=knownGene&amp;db=mm10&amp;hgsid=500967801_Vakd6YZAzH49xqeBY7x8QEfmp51u">http://genome.ucsc.edu/cgi-bin/hgGene?hgg_gene=uc012hsg.1&amp;hgg_prot=J3KMI7&amp;hgg_chrom=chrY&amp;hgg_start=15882558&amp;hgg_end=15883245&amp;hgg_type=knownGene&amp;db=mm10&amp;hgsid=500967801_Vakd6YZAzH49xqeBY7x8QEfmp51u</a> |
| Gm20822 | chrY:11,19<br>7,162-<br>11,197,848 | predicted gene,<br>20822<br>(Gm20822),<br>mRNA | <a href="http://genome.ucsc.edu/cgi-bin/hgGene?hgg_gene=uc012hsi.1&amp;hgg_prot=J3KMI7&amp;hgg_chrom=chrY&amp;hgg_start=11197161&amp;hgg_end=11197848&amp;hgg_type=knownGene&amp;db=mm10&amp;hgsid=500967801_Vakd6YZAzH49xqeBY7x8QEfmp51u">http://genome.ucsc.edu/cgi-bin/hgGene?hgg_gene=uc012hsi.1&amp;hgg_prot=J3KMI7&amp;hgg_chrom=chrY&amp;hgg_start=11197161&amp;hgg_end=11197848&amp;hgg_type=knownGene&amp;db=mm10&amp;hgsid=500967801_Vakd6YZAzH49xqeBY7x8QEfmp51u</a> |
| Gm20826 | chrY:7,167<br>,094-<br>7,167,777   | predicted gene,<br>20826<br>(Gm20826),<br>mRNA | <a href="http://genome.ucsc.edu/cgi-bin/hgGene?hgg_gene=uc012hsn.2&amp;hgg_prot=J3QK38&amp;hgg_chrom=chrY&amp;hgg_start=7167019&amp;hgg_end=7636973&amp;hgg_type=knownGene&amp;db=mm10&amp;hgsid=500967801_Vakd6YZAzH49xqeBY7x8QEfmp51u">http://genome.ucsc.edu/cgi-bin/hgGene?hgg_gene=uc012hsn.2&amp;hgg_prot=J3QK38&amp;hgg_chrom=chrY&amp;hgg_start=7167019&amp;hgg_end=7636973&amp;hgg_type=knownGene&amp;db=mm10&amp;hgsid=500967801_Vakd6YZAzH49xqeBY7x8QEfmp51u</a>     |
| Gm20831 | chrY:17,96<br>6,778-<br>17,967,476 | predicted gene,<br>20831<br>(Gm20831),<br>mRNA | <a href="http://genome.ucsc.edu/cgi-bin/hgGene?hgg_gene=uc009vfw.1&amp;hgg_prot=Q3TTD8&amp;hgg_chrom=chrY&amp;hgg_start=17965159&amp;hgg_end=17967598&amp;hgg_type=knownGene&amp;db=mm10&amp;hgsid=500967801_Vakd6YZAzH49xqeBY7x8QEfmp51u">http://genome.ucsc.edu/cgi-bin/hgGene?hgg_gene=uc009vfw.1&amp;hgg_prot=Q3TTD8&amp;hgg_chrom=chrY&amp;hgg_start=17965159&amp;hgg_end=17967598&amp;hgg_type=knownGene&amp;db=mm10&amp;hgsid=500967801_Vakd6YZAzH49xqeBY7x8QEfmp51u</a> |
| Gm20831 | chrY:17,96<br>6,778-<br>17,967,476 | predicted gene,<br>20831<br>(Gm20831),<br>mRNA | <a href="http://genome.ucsc.edu/cgi-bin/hgGene?hgg_gene=uc009vfw.1&amp;hgg_prot=Q3TTD8&amp;hgg_chrom=chrY&amp;hgg_start=17965159&amp;hgg_end=17967598&amp;hgg_type=knownGene&amp;db=mm10&amp;hgsid=500967801_Vakd6YZAzH49xqeBY7x8QEfmp51u">http://genome.ucsc.edu/cgi-bin/hgGene?hgg_gene=uc009vfw.1&amp;hgg_prot=Q3TTD8&amp;hgg_chrom=chrY&amp;hgg_start=17965159&amp;hgg_end=17967598&amp;hgg_type=knownGene&amp;db=mm10&amp;hgsid=500967801_Vakd6YZAzH49xqeBY7x8QEfmp51u</a> |

|         |                                    |                                                             |                                                                                                                                                                                                                                                                                                                                                                                                                                                                                         |
|---------|------------------------------------|-------------------------------------------------------------|-----------------------------------------------------------------------------------------------------------------------------------------------------------------------------------------------------------------------------------------------------------------------------------------------------------------------------------------------------------------------------------------------------------------------------------------------------------------------------------------|
| Gm20831 | chrY:13,25<br>4,009-<br>13,254,707 | predicted gene,<br>20831<br>(Gm20831),<br>mRNA              | <a href="http://genome.ucsc.edu/cgi-bin/hgGene?hgg_gene=uc029xrz.1&amp;hgg_prot=Q3TTD8&amp;hgg_chrom=chrY&amp;hgg_start=13252390&amp;hgg_end=13254829&amp;hgg_type=knownGene&amp;db=mm10&amp;hgsid=500967801_Vakd6YZAzH49xqeBY7x8QEfmp51u">http://genome.ucsc.edu/cgi-bin/hgGene?hgg_gene=uc029xrz.1&amp;hgg_prot=Q3TTD8&amp;hgg_chrom=chrY&amp;hgg_start=13252390&amp;hgg_end=13254829&amp;hgg_type=knownGene&amp;db=mm10&amp;hgsid=500967801_Vakd6YZAzH49xqeBY7x8QEfmp51u</a>         |
| Gm20837 | chrY:44,20<br>9,133-<br>44,263,016 | -                                                           | <a href="http://genome.ucsc.edu/cgi-bin/hgGene?hgg_gene=uc029xyf.1&amp;hgg_prot=A0A087WP97&amp;hgg_chrom=chrY&amp;hgg_start=44209121&amp;hgg_end=44263039&amp;hgg_type=knownGene&amp;db=mm10&amp;hgsid=500967801_Vakd6YZAzH49xqeBY7x8QEfmp51u">http://genome.ucsc.edu/cgi-bin/hgGene?hgg_gene=uc029xyf.1&amp;hgg_prot=A0A087WP97&amp;hgg_chrom=chrY&amp;hgg_start=44209121&amp;hgg_end=44263039&amp;hgg_type=knownGene&amp;db=mm10&amp;hgsid=500967801_Vakd6YZAzH49xqeBY7x8QEfmp51u</a> |
| Gm20837 | chrY:30,68<br>2,565-<br>30,737,131 | -                                                           | <a href="http://genome.ucsc.edu/cgi-bin/hgGene?hgg_gene=uc029xuc.1&amp;hgg_prot=A0A087WP97&amp;hgg_chrom=chrY&amp;hgg_start=30682553&amp;hgg_end=30737154&amp;hgg_type=knownGene&amp;db=mm10&amp;hgsid=500967801_Vakd6YZAzH49xqeBY7x8QEfmp51u">http://genome.ucsc.edu/cgi-bin/hgGene?hgg_gene=uc029xuc.1&amp;hgg_prot=A0A087WP97&amp;hgg_chrom=chrY&amp;hgg_start=30682553&amp;hgg_end=30737154&amp;hgg_type=knownGene&amp;db=mm10&amp;hgsid=500967801_Vakd6YZAzH49xqeBY7x8QEfmp51u</a> |
| Gm20837 | chrY:29,62<br>8,689-<br>29,683,370 | -                                                           | <a href="http://genome.ucsc.edu/cgi-bin/hgGene?hgg_gene=uc029xtf.1&amp;hgg_prot=A0A087WP97&amp;hgg_chrom=chrY&amp;hgg_start=29628677&amp;hgg_end=29683393&amp;hgg_type=knownGene&amp;db=mm10&amp;hgsid=500967801_Vakd6YZAzH49xqeBY7x8QEfmp51u">http://genome.ucsc.edu/cgi-bin/hgGene?hgg_gene=uc029xtf.1&amp;hgg_prot=A0A087WP97&amp;hgg_chrom=chrY&amp;hgg_start=29628677&amp;hgg_end=29683393&amp;hgg_type=knownGene&amp;db=mm10&amp;hgsid=500967801_Vakd6YZAzH49xqeBY7x8QEfmp51u</a> |
| Gm20857 | chrY:26,24<br>1,092-<br>26,267,093 | predicted gene,<br>20857<br>(Gm20857),<br>non-coding<br>RNA | <a href="http://genome.ucsc.edu/cgi-bin/hgGene?hgg_gene=uc029xtb.1&amp;hgg_prot=&amp;hgg_chrom=chrY&amp;hgg_start=26241091&amp;hgg_end=26267093&amp;hgg_type=knownGene&amp;db=mm10&amp;hgsid=500967801_Vakd6YZAzH49xqeBY7x8QEfmp51u">http://genome.ucsc.edu/cgi-bin/hgGene?hgg_gene=uc029xtb.1&amp;hgg_prot=&amp;hgg_chrom=chrY&amp;hgg_start=26241091&amp;hgg_end=26267093&amp;hgg_type=knownGene&amp;db=mm10&amp;hgsid=500967801_Vakd6YZAzH49xqeBY7x8QEfmp51u</a>                     |
| Gm20857 | chrY:25,72<br>7,936-<br>25,753,940 | predicted gene,<br>20857<br>(Gm20857),<br>non-coding<br>RNA | <a href="http://genome.ucsc.edu/cgi-bin/hgGene?hgg_gene=uc029xsz.1&amp;hgg_prot=&amp;hgg_chrom=chrY&amp;hgg_start=25727935&amp;hgg_end=25753940&amp;hgg_type=knownGene&amp;db=mm10&amp;hgsid=500967801_Vakd6YZAzH49xqeBY7x8QEfmp51u">http://genome.ucsc.edu/cgi-bin/hgGene?hgg_gene=uc029xsz.1&amp;hgg_prot=&amp;hgg_chrom=chrY&amp;hgg_start=25727935&amp;hgg_end=25753940&amp;hgg_type=knownGene&amp;db=mm10&amp;hgsid=500967801_Vakd6YZAzH49xqeBY7x8QEfmp51u</a>                     |
| Gm20857 | chrY:25,21<br>4,874-<br>25,240,906 | predicted gene,<br>20857<br>(Gm20857),<br>non-coding<br>RNA | <a href="http://genome.ucsc.edu/cgi-bin/hgGene?hgg_gene=uc029xsx.1&amp;hgg_prot=&amp;hgg_chrom=chrY&amp;hgg_start=25214873&amp;hgg_end=25240906&amp;hgg_type=knownGene&amp;db=mm10&amp;hgsid=500967801_Vakd6YZAzH49xqeBY7x8QEfmp51u">http://genome.ucsc.edu/cgi-bin/hgGene?hgg_gene=uc029xsx.1&amp;hgg_prot=&amp;hgg_chrom=chrY&amp;hgg_start=25214873&amp;hgg_end=25240906&amp;hgg_type=knownGene&amp;db=mm10&amp;hgsid=500967801_Vakd6YZAzH49xqeBY7x8QEfmp51u</a>                     |
| Gm20857 | chrY:24,70<br>1,804-<br>24,727,810 | predicted gene,<br>20857<br>(Gm20857),<br>non-coding<br>RNA | <a href="http://genome.ucsc.edu/cgi-bin/hgGene?hgg_gene=uc029xsv.1&amp;hgg_prot=&amp;hgg_chrom=chrY&amp;hgg_start=24701803&amp;hgg_end=24727810&amp;hgg_type=knownGene&amp;db=mm10&amp;hgsid=500967801_Vakd6YZAzH49xqeBY7x8QEfmp51u">http://genome.ucsc.edu/cgi-bin/hgGene?hgg_gene=uc029xsv.1&amp;hgg_prot=&amp;hgg_chrom=chrY&amp;hgg_start=24701803&amp;hgg_end=24727810&amp;hgg_type=knownGene&amp;db=mm10&amp;hgsid=500967801_Vakd6YZAzH49xqeBY7x8QEfmp51u</a>                     |
| Gm20857 | chrY:24,18<br>8,659-<br>24,214,668 | predicted gene,<br>20857<br>(Gm20857),<br>non-coding<br>RNA | <a href="http://genome.ucsc.edu/cgi-bin/hgGene?hgg_gene=uc029xst.1&amp;hgg_prot=&amp;hgg_chrom=chrY&amp;hgg_start=24188658&amp;hgg_end=24214668&amp;hgg_type=knownGene&amp;db=mm10&amp;hgsid=500967801_Vakd6YZAzH49xqeBY7x8QEfmp51u">http://genome.ucsc.edu/cgi-bin/hgGene?hgg_gene=uc029xst.1&amp;hgg_prot=&amp;hgg_chrom=chrY&amp;hgg_start=24188658&amp;hgg_end=24214668&amp;hgg_type=knownGene&amp;db=mm10&amp;hgsid=500967801_Vakd6YZAzH49xqeBY7x8QEfmp51u</a>                     |



|         |                                    |                                                             |                                                                                                                                                                                                                                                                                                                                                                                                                                                                                         |
|---------|------------------------------------|-------------------------------------------------------------|-----------------------------------------------------------------------------------------------------------------------------------------------------------------------------------------------------------------------------------------------------------------------------------------------------------------------------------------------------------------------------------------------------------------------------------------------------------------------------------------|
| Gm20865 | chrY:21,24<br>3,092-<br>21,243,775 | predicted gene,<br>20865<br>(Gm20865),<br>mRNA              | <a href="http://genome.ucsc.edu/cgi-bin/hgGene?hgg_gene=uc029xsn.1&amp;hgg_prot=Q62460&amp;hgg_chrom=chrY&amp;hgg_start=21242965&amp;hgg_end=21243823&amp;hgg_type=knownGene&amp;db=mm10&amp;hgsid=500967801_Vakd6YZAzH49xqeBY7x8QEfmp51u">http://genome.ucsc.edu/cgi-bin/hgGene?hgg_gene=uc029xsn.1&amp;hgg_prot=Q62460&amp;hgg_chrom=chrY&amp;hgg_start=21242965&amp;hgg_end=21243823&amp;hgg_type=knownGene&amp;db=mm10&amp;hgsid=500967801_Vakd6YZAzH49xqeBY7x8QEfmp51u</a>         |
| Gm20871 | chrY:42,93<br>0,323-<br>43,978,241 | predicted gene,<br>20871<br>(Gm20871),<br>non-coding<br>RNA | <a href="http://genome.ucsc.edu/cgi-bin/hgGene?hgg_gene=uc029xya.1&amp;hgg_prot=&amp;hgg_chrom=chrY&amp;hgg_start=42930322&amp;hgg_end=43978241&amp;hgg_type=knownGene&amp;db=mm10&amp;hgsid=500967801_Vakd6YZAzH49xqeBY7x8QEfmp51u">http://genome.ucsc.edu/cgi-bin/hgGene?hgg_gene=uc029xya.1&amp;hgg_prot=&amp;hgg_chrom=chrY&amp;hgg_start=42930322&amp;hgg_end=43978241&amp;hgg_type=knownGene&amp;db=mm10&amp;hgsid=500967801_Vakd6YZAzH49xqeBY7x8QEfmp51u</a>                     |
| Gm20871 | chrY:30,49<br>9,166-<br>30,523,158 | predicted gene,<br>20871<br>(Gm20871),<br>non-coding<br>RNA | <a href="http://genome.ucsc.edu/cgi-bin/hgGene?hgg_gene=uc029xub.1&amp;hgg_prot=A0A087WSR0&amp;hgg_chrom=chrY&amp;hgg_start=30497728&amp;hgg_end=30523759&amp;hgg_type=knownGene&amp;db=mm10&amp;hgsid=500967801_Vakd6YZAzH49xqeBY7x8QEfmp51u">http://genome.ucsc.edu/cgi-bin/hgGene?hgg_gene=uc029xub.1&amp;hgg_prot=A0A087WSR0&amp;hgg_chrom=chrY&amp;hgg_start=30497728&amp;hgg_end=30523759&amp;hgg_type=knownGene&amp;db=mm10&amp;hgsid=500967801_Vakd6YZAzH49xqeBY7x8QEfmp51u</a> |
| Gm20877 | chrY:17,09<br>5,074-<br>17,095,757 | predicted gene,<br>20877<br>(Gm20877),<br>mRNA              | <a href="http://genome.ucsc.edu/cgi-bin/hgGene?hgg_gene=uc029xsc.1&amp;hgg_prot=J3QPZ4&amp;hgg_chrom=chrY&amp;hgg_start=17093878&amp;hgg_end=17095887&amp;hgg_type=knownGene&amp;db=mm10&amp;hgsid=500967801_Vakd6YZAzH49xqeBY7x8QEfmp51u">http://genome.ucsc.edu/cgi-bin/hgGene?hgg_gene=uc029xsc.1&amp;hgg_prot=J3QPZ4&amp;hgg_chrom=chrY&amp;hgg_start=17093878&amp;hgg_end=17095887&amp;hgg_type=knownGene&amp;db=mm10&amp;hgsid=500967801_Vakd6YZAzH49xqeBY7x8QEfmp51u</a>         |
| Gm20877 | chrY:17,09<br>5,074-<br>17,095,757 | predicted gene,<br>20877<br>(Gm20877),<br>mRNA              | <a href="http://genome.ucsc.edu/cgi-bin/hgGene?hgg_gene=uc029xsc.1&amp;hgg_prot=J3QPZ4&amp;hgg_chrom=chrY&amp;hgg_start=17093878&amp;hgg_end=17095887&amp;hgg_type=knownGene&amp;db=mm10&amp;hgsid=500967801_Vakd6YZAzH49xqeBY7x8QEfmp51u">http://genome.ucsc.edu/cgi-bin/hgGene?hgg_gene=uc029xsc.1&amp;hgg_prot=J3QPZ4&amp;hgg_chrom=chrY&amp;hgg_start=17093878&amp;hgg_end=17095887&amp;hgg_type=knownGene&amp;db=mm10&amp;hgsid=500967801_Vakd6YZAzH49xqeBY7x8QEfmp51u</a>         |
| Gm20877 | chrY:12,38<br>3,184-<br>12,383,867 | predicted gene,<br>20877<br>(Gm20877),<br>mRNA              | <a href="http://genome.ucsc.edu/cgi-bin/hgGene?hgg_gene=uc012hsk.1&amp;hgg_prot=J3QPZ4&amp;hgg_chrom=chrY&amp;hgg_start=12381988&amp;hgg_end=12383997&amp;hgg_type=knownGene&amp;db=mm10&amp;hgsid=500967801_Vakd6YZAzH49xqeBY7x8QEfmp51u">http://genome.ucsc.edu/cgi-bin/hgGene?hgg_gene=uc012hsk.1&amp;hgg_prot=J3QPZ4&amp;hgg_chrom=chrY&amp;hgg_start=12381988&amp;hgg_end=12383997&amp;hgg_type=knownGene&amp;db=mm10&amp;hgsid=500967801_Vakd6YZAzH49xqeBY7x8QEfmp51u</a>         |
| Gm20917 | chrY:23,03<br>1,235-<br>23,031,918 | predicted gene,<br>20917<br>(Gm20917),<br>mRNA              | <a href="http://genome.ucsc.edu/cgi-bin/hgGene?hgg_gene=uc029xsr.1&amp;hgg_prot=Q62457&amp;hgg_chrom=chrY&amp;hgg_start=23031058&amp;hgg_end=23032050&amp;hgg_type=knownGene&amp;db=mm10&amp;hgsid=500967801_Vakd6YZAzH49xqeBY7x8QEfmp51u">http://genome.ucsc.edu/cgi-bin/hgGene?hgg_gene=uc029xsr.1&amp;hgg_prot=Q62457&amp;hgg_chrom=chrY&amp;hgg_start=23031058&amp;hgg_end=23032050&amp;hgg_type=knownGene&amp;db=mm10&amp;hgsid=500967801_Vakd6YZAzH49xqeBY7x8QEfmp51u</a>         |
| Gm21746 | chrY:6,237<br>,453-<br>6,237,995   | predicted gene,<br>21746<br>(Gm21746),<br>mRNA              | <a href="https://genome.ucsc.edu/cgi-bin/hgc?hgsid=512004667_nnUUiRL0XAEIvOvMqv8RWMa25fHI&amp;c=chrY&amp;l=6119999&amp;r=6570000&amp;o=6237452&amp;t=6237995&amp;g=ensGene&amp;i=ENSMUST00000177612">https://genome.ucsc.edu/cgi-bin/hgc?hgsid=512004667_nnUUiRL0XAEIvOvMqv8RWMa25fHI&amp;c=chrY&amp;l=6119999&amp;r=6570000&amp;o=6237452&amp;t=6237995&amp;g=ensGene&amp;i=ENSMUST00000177612</a>                                                                                     |
| Gm20873 | chrY:6,268<br>,725-<br>6,269,423   | predicted gene,<br>20873<br>(Gm20873),<br>mRNA              | <a href="https://genome.ucsc.edu/cgi-bin/hgc?hgsid=512004667_nnUUiRL0XAEIvOvMqv8RWMa25fHI&amp;c=chrY&amp;l=6119999&amp;r=6570000&amp;o=6268724&amp;t=6269423&amp;g=ensGene&amp;i=ENSMUST00000179410">https://genome.ucsc.edu/cgi-bin/hgc?hgsid=512004667_nnUUiRL0XAEIvOvMqv8RWMa25fHI&amp;c=chrY&amp;l=6119999&amp;r=6570000&amp;o=6268724&amp;t=6269423&amp;g=ensGene&amp;i=ENSMUST00000179410</a>                                                                                     |

|          |                            |                                                                                        |                                                                                                                                                                                                                                                                                                                                                                                                                                                                       |
|----------|----------------------------|----------------------------------------------------------------------------------------|-----------------------------------------------------------------------------------------------------------------------------------------------------------------------------------------------------------------------------------------------------------------------------------------------------------------------------------------------------------------------------------------------------------------------------------------------------------------------|
| AB351778 | chrY:6,530,295-6,530,316   | Mus musculus non-coding RNA, oocyte_piRNA 2594                                         | <a href="https://genome.ucsc.edu/cgi-bin/hgc?hgsid=512004667_nnUUiRL0XAEIvOvMqv8RWMa25fHI&amp;c=chrY&amp;l=6119999&amp;r=6570000&amp;o=6530294&amp;t=6530316&amp;g=mrna&amp;i=AB351778">https://genome.ucsc.edu/cgi-bin/hgc?hgsid=512004667_nnUUiRL0XAEIvOvMqv8RWMa25fHI&amp;c=chrY&amp;l=6119999&amp;r=6570000&amp;o=6530294&amp;t=6530316&amp;g=mrna&amp;i=AB351778</a>                                                                                             |
| AB349505 | chrY:6,530,296-6,530,319   | Mus musculus non-coding RNA, oocyte_piRNA 321                                          | <a href="https://genome.ucsc.edu/cgi-bin/hgc?hgsid=512004667_nnUUiRL0XAEIvOvMqv8RWMa25fHI&amp;c=chrY&amp;l=6119999&amp;r=6570000&amp;o=6530295&amp;t=6530319&amp;g=mrna&amp;i=AB349505">https://genome.ucsc.edu/cgi-bin/hgc?hgsid=512004667_nnUUiRL0XAEIvOvMqv8RWMa25fHI&amp;c=chrY&amp;l=6119999&amp;r=6570000&amp;o=6530295&amp;t=6530319&amp;g=mrna&amp;i=AB349505</a>                                                                                             |
| AB349959 | chrY:6,530,337-6,530,361   | Mus musculus non-coding RNA, oocyte_piRNA 775                                          | <a href="https://genome.ucsc.edu/cgi-bin/hgc?hgsid=512004667_nnUUiRL0XAEIvOvMqv8RWMa25fHI&amp;c=chrY&amp;l=6119999&amp;r=6570000&amp;o=6530336&amp;t=6530361&amp;g=mrna&amp;i=AB349959">https://genome.ucsc.edu/cgi-bin/hgc?hgsid=512004667_nnUUiRL0XAEIvOvMqv8RWMa25fHI&amp;c=chrY&amp;l=6119999&amp;r=6570000&amp;o=6530336&amp;t=6530361&amp;g=mrna&amp;i=AB349959</a>                                                                                             |
| DQ874391 | chrY:46,847,641-46,850,004 | Mus musculus amplified spermatogenic transcript Y-encoded mRNA sequence                | <a href="https://genome.ucsc.edu/cgi-bin/hgGene?hgg_gene=uc029xzc.1&amp;hgg_prot=&amp;hgg_chrom=chrY&amp;hgg_start=46847640&amp;hgg_end=46850004&amp;hgg_type=knownGene&amp;db=mm10&amp;hgsid=512004667_nnUUiRL0XAEIvOvMqv8RWMa25fHI">https://genome.ucsc.edu/cgi-bin/hgGene?hgg_gene=uc029xzc.1&amp;hgg_prot=&amp;hgg_chrom=chrY&amp;hgg_start=46847640&amp;hgg_end=46850004&amp;hgg_type=knownGene&amp;db=mm10&amp;hgsid=512004667_nnUUiRL0XAEIvOvMqv8RWMa25fHI</a> |
| Gm21247  | chrY:46,757,399-46,758,082 | predicted gene, 21247 (Gm21247), mRNA                                                  | <a href="https://genome.ucsc.edu/cgi-bin/hgc?hgsid=512004667_nnUUiRL0XAEIvOvMqv8RWMa25fHI&amp;c=chrY&amp;l=46729999&amp;r=47310000&amp;o=46757398&amp;t=46758082&amp;g=ensGene&amp;i=ENSMUST00000179950">https://genome.ucsc.edu/cgi-bin/hgc?hgsid=512004667_nnUUiRL0XAEIvOvMqv8RWMa25fHI&amp;c=chrY&amp;l=46729999&amp;r=47310000&amp;o=46757398&amp;t=46758082&amp;g=ensGene&amp;i=ENSMUST00000179950</a>                                                           |
| DQ874392 | chrY:46,847,641-46,850,004 | Mus musculus amplified spermatogenic transcript Y-encoded splice variant mRNA sequence | <a href="https://genome.ucsc.edu/cgi-bin/hgc?hgsid=512004667_nnUUiRL0XAEIvOvMqv8RWMa25fHI&amp;c=chrY&amp;l=46729999&amp;r=47310000&amp;o=46847640&amp;t=46850004&amp;g=mrna&amp;i=DQ874392">https://genome.ucsc.edu/cgi-bin/hgc?hgsid=512004667_nnUUiRL0XAEIvOvMqv8RWMa25fHI&amp;c=chrY&amp;l=46729999&amp;r=47310000&amp;o=46847640&amp;t=46850004&amp;g=mrna&amp;i=DQ874392</a>                                                                                     |
| AB340532 | chrY:46,826,544-46,826,564 | Mus musculus non-coding RNA, oocyte_clustered_small_RNA5733, complete sequence         | <a href="https://genome.ucsc.edu/cgi-bin/hgc?hgsid=512004667_nnUUiRL0XAEIvOvMqv8RWMa25fHI&amp;c=chrY&amp;l=46729999&amp;r=47310000&amp;o=46826543&amp;t=46826564&amp;g=mrna&amp;i=AB340532">https://genome.ucsc.edu/cgi-bin/hgc?hgsid=512004667_nnUUiRL0XAEIvOvMqv8RWMa25fHI&amp;c=chrY&amp;l=46729999&amp;r=47310000&amp;o=46826543&amp;t=46826564&amp;g=mrna&amp;i=AB340532</a>                                                                                     |
| FJ386436 | chrY:46,872,414-46,872,940 | Y-linked testis-specific protein variant 2                                             | <a href="https://genome.ucsc.edu/cgi-bin/hgc?hgsid=512004667_nnUUiRL0XAEIvOvMqv8RWMa25fHI&amp;c=chrY&amp;l=46729999&amp;r=47310000&amp;o=46872413&amp;t=46872940&amp;g=mrna&amp;i=FJ386436">https://genome.ucsc.edu/cgi-bin/hgc?hgsid=512004667_nnUUiRL0XAEIvOvMqv8RWMa25fHI&amp;c=chrY&amp;l=46729999&amp;r=47310000&amp;o=46872413&amp;t=46872940&amp;g=mrna&amp;i=FJ386436</a>                                                                                     |

|          |                                    |                                                                                                                  |                                                                                                                                                                                                                                                                                                                                                                                   |
|----------|------------------------------------|------------------------------------------------------------------------------------------------------------------|-----------------------------------------------------------------------------------------------------------------------------------------------------------------------------------------------------------------------------------------------------------------------------------------------------------------------------------------------------------------------------------|
| FJ386435 | chrY:46,87<br>2,457-<br>46,872,940 | Y-linked testis-specific protein variant 1                                                                       | <a href="https://genome.ucsc.edu/cgi-bin/hgc?hgsid=512004667_nnUUiRL0XAEIvOvMqv8RWMa25fHI&amp;c=chrY&amp;l=46729999&amp;r=47310000&amp;o=46872456&amp;t=46872940&amp;g=mrna&amp;i=FJ386435">https://genome.ucsc.edu/cgi-bin/hgc?hgsid=512004667_nnUUiRL0XAEIvOvMqv8RWMa25fHI&amp;c=chrY&amp;l=46729999&amp;r=47310000&amp;o=46872456&amp;t=46872940&amp;g=mrna&amp;i=FJ386435</a> |
| AB349959 | chrY:47,15<br>6,745-<br>47,156,769 | Mus musculus non-coding RNA, oocyte_piRNA 775                                                                    | <a href="https://genome.ucsc.edu/cgi-bin/hgc?hgsid=512004667_nnUUiRL0XAEIvOvMqv8RWMa25fHI&amp;c=chrY&amp;l=46729999&amp;r=47310000&amp;o=47156744&amp;t=47156769&amp;g=mrna&amp;i=AB349959">https://genome.ucsc.edu/cgi-bin/hgc?hgsid=512004667_nnUUiRL0XAEIvOvMqv8RWMa25fHI&amp;c=chrY&amp;l=46729999&amp;r=47310000&amp;o=47156744&amp;t=47156769&amp;g=mrna&amp;i=AB349959</a> |
| FJ386435 | chrY:47,29<br>1,729-<br>47,292,212 | Mus musculus strain C57BL/6J Y-linked testis-specific protein variant 1 mRNA, partial cds, alternatively spliced | <a href="https://genome.ucsc.edu/cgi-bin/hgc?hgsid=512004667_nnUUiRL0XAEIvOvMqv8RWMa25fHI&amp;c=chrY&amp;l=46729999&amp;r=47310000&amp;o=47291728&amp;t=4729212&amp;g=mrna&amp;i=FJ386435">https://genome.ucsc.edu/cgi-bin/hgc?hgsid=512004667_nnUUiRL0XAEIvOvMqv8RWMa25fHI&amp;c=chrY&amp;l=46729999&amp;r=47310000&amp;o=47291728&amp;t=4729212&amp;g=mrna&amp;i=FJ386435</a>   |
| Srsy     | chrY:17,93<br>5,719-<br>17,937,324 | serine-rich secreted Y-linked protein                                                                            | <a href="https://genome.ucsc.edu/cgi-bin/hgc?hgsid=512120325_Z7CxwoNZvwGKxJeSPJVicYKuSQLa&amp;c=chrY&amp;l=17935718&amp;r=17937324&amp;o=17935712&amp;t=17937330&amp;g=mrna&amp;i=EU052291">https://genome.ucsc.edu/cgi-bin/hgc?hgsid=512120325_Z7CxwoNZvwGKxJeSPJVicYKuSQLa&amp;c=chrY&amp;l=17935718&amp;r=17937324&amp;o=17935712&amp;t=17937330&amp;g=mrna&amp;i=EU052291</a> |

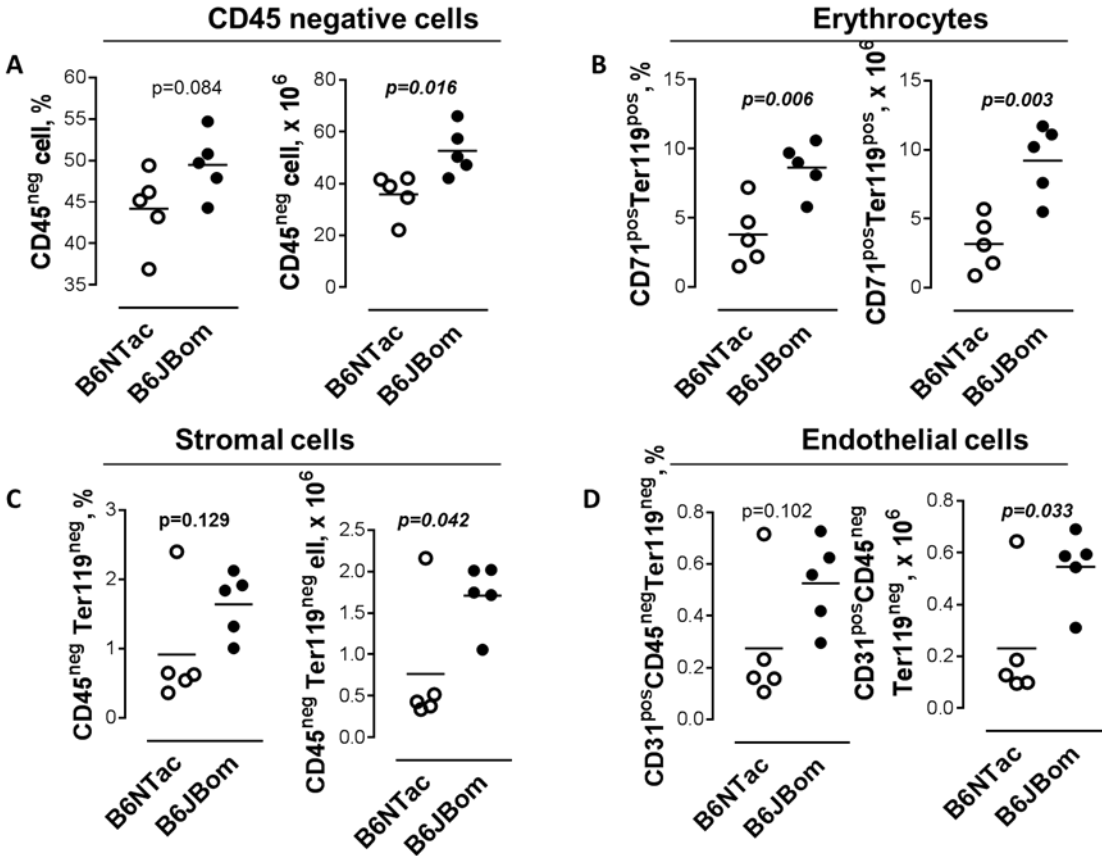

Fig S1. Characterization of changes within CD45<sup>neg</sup> non-immune subpopulations of B6JBom and B6NTac spleen cells **A)** Percentage and absolute values of total CD45<sup>neg</sup> population **B)** Percentage and absolute values of erythrocyte subpopulation **C)** Percentage and absolute values of the stromal cell subpopulation **D)** Percentage and absolute values of endothelial cell subpopulation.

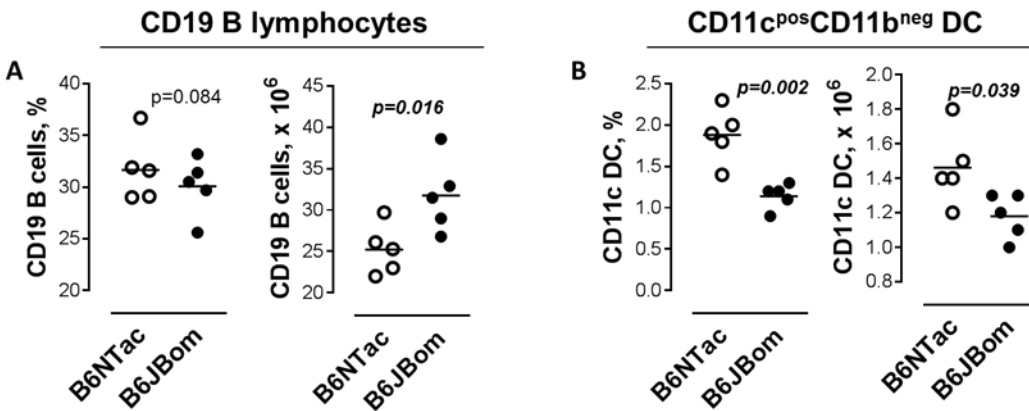

Fig S2. Characterization of changes within CD45<sup>pos</sup> immune subpopulations of B6JBom and B6NTac spleen cells **A)** Percentage and absolute values of CD19 B lymphocytes **B)** Percentage and absolute values of CD11c<sup>pos</sup> CD11b<sup>neg</sup> dendritic cells.

Table S5. Subpopulations of CD45 non-immune and CD45 immune cells in male mouse spleen of B6NTac and B6JBom

| % Cell Population                                                          | B6NTac |      |   | B6JBom |      |   | P value      |
|----------------------------------------------------------------------------|--------|------|---|--------|------|---|--------------|
|                                                                            | Mean   | SEM  | n | Mean   | SEM  | n |              |
| Spleen weight, mg                                                          | 71.20  | 2.97 | 5 | 88.96  | 4.91 | 5 | <b>0.015</b> |
| Viable cells, %                                                            | 90.64  | 0.57 | 5 | 90.50  | 0.50 | 5 | 0.823        |
| CD45 <sup>neg</sup> cells, %                                               | 44.18  | 2.08 | 5 | 49.48  | 1.71 | 5 | 0.084        |
| Erythrocytes (CD45-, CD71-, Ter119+), %                                    | 39.38  | 1.18 | 5 | 39.12  | 1.05 | 5 | 0.873        |
| Mature erythrocytes (CD45-, CD71+, Ter119+), %                             | 3.80   | 1.01 | 5 | 8.64   | 0.82 | 5 | <b>0.006</b> |
| Stromal cells (CD45-, CD71-, Ter119-) %                                    | 0.92   | 0.37 | 5 | 1.64   | 0.21 | 5 | 0.129        |
| Endothelial cells (CD45-, CD71-, Ter119-, CD31+, Sca1-), %                 | 0.27   | 0.11 | 5 | 0.53   | 0.08 | 5 | 0.102        |
| Fibroblasts (CD45-, CD71-, Ter119-, CD31+, Sca1+), %                       | 0.17   | 0.15 | 5 | 0.36   | 0.05 | 5 | 0.269        |
| Mesenchymal Stem cells (CD45-, CD71-, Ter119-, CD31-, Sca1+), %            | 0.11   | 0.04 | 5 | 0.18   | 0.03 | 5 | 0.158        |
| CD45 <sup>pos</sup> immune cells, %                                        | 55.44  | 2.06 | 5 | 50.06  | 1.69 | 5 | 0.078        |
| T cells (CD45+, CD3+), %                                                   | 11.06  | 0.52 | 5 | 8.50   | 0.36 | 5 | <b>0.004</b> |
| T helper cells (CD45+, CD3+, CD4+), %                                      | 6.60   | 0.38 | 5 | 5.30   | 0.35 | 5 | <b>0.037</b> |
| Cytotoxic T cells (CD45+, CD3+, CD8+), %                                   | 3.34   | 0.16 | 5 | 2.24   | 0.15 | 5 | <b>0.001</b> |
| B lymphocytes (CD45+, CD19+), %                                            | 31.66  | 1.40 | 5 | 30.08  | 1.26 | 5 | 0.425        |
| Natural killer cells (CD45+, NK1.1+), %                                    | 3.50   | 0.14 | 5 | 2.46   | 0.18 | 5 | <b>0.002</b> |
| Myeloid cells (CD45+, CD11b+, CD11c+, %                                    | 2.54   | 0.11 | 5 | 2.30   | 0.27 | 5 | 0.433        |
| Myeloid phagocytic cells (CD45+, CD11c+, MHCII/F4/80+), %                  | 1.88   | 0.15 | 5 | 1.14   | 0.07 | 5 | <b>0.002</b> |
| Neutrophils (CD45+, CD11b+, Gr-1+), %                                      | 0.90   | 0.12 | 5 | 0.87   | 0.18 | 5 | 0.878        |
| Macrophages (CD45+, CD11b+, MHCII/F4/80+, GR1-), %                         | 0.41   | 0.05 | 5 | 0.23   | 0.04 | 5 | <b>0.018</b> |
| Total Number of Cells                                                      |        |      |   |        |      |   |              |
| Total cell, x 10 <sup>6</sup>                                              | 80.40  | 5.78 | 5 | 106.00 | 6.40 | 5 | <b>0.018</b> |
| CD45-cells, x 10 <sup>6</sup>                                              | 35.86  | 3.68 | 5 | 52.60  | 4.17 | 5 | <b>0.016</b> |
| Erythrocytes (CD45-, CD71-, Ter119+) erythrocytes, x 10 <sup>6</sup>       | 31.88  | 2.91 | 5 | 41.56  | 3.12 | 5 | 0.053        |
| Mature erythrocytes (CD45-, CD71+, Ter119+), x 10 <sup>6</sup>             | 3.18   | 0.86 | 5 | 9.22   | 1.16 | 5 | <b>0.003</b> |
| Stromal cells (CD45-, CD71-, Ter119-), x 10 <sup>6</sup>                   | 0.76   | 0.35 | 5 | 1.71   | 0.18 | 5 | <b>0.042</b> |
| Endothelial cells (CD45-, CD71-, Ter119-, CD31+, Sca1-), x 10 <sup>6</sup> | 0.23   | 0.10 | 5 | 0.55   | 0.06 | 5 | <b>0.033</b> |
| Fibroblasts (CD45-, CD71-, Ter119-, CD31+, Sca1+), x 10 <sup>6</sup>       | 0.15   | 0.14 | 5 | 0.37   | 0.04 | 5 | 0.158        |

|                                                                                 |       |      |   |       |      |   |              |
|---------------------------------------------------------------------------------|-------|------|---|-------|------|---|--------------|
| Mesenchymal stem cells (CD45-, CD71-, Ter119-, CD31-, Sca1+), x 10 <sup>6</sup> | 0.09  | 0.04 | 5 | 0.19  | 0.02 | 5 | 0.051        |
| CD45 <sup>pos</sup> immune cells, x 10 <sup>6</sup>                             | 44.24 | 2.44 | 5 | 52.90 | 2.95 | 5 | 0.053        |
| T cells (CD45+, CD3+), x 10 <sup>6</sup>                                        | 8.82  | 0.65 | 5 | 8.92  | 0.36 | 5 | 0.896        |
| T helper cells (CD45+, CD3+, CD4+), x 10 <sup>6</sup>                           | 5.26  | 0.41 | 5 | 5.56  | 0.31 | 5 | 0.578        |
| Cytotoxic T cells (CD45+, CD3+, CD8+), x 10 <sup>6</sup>                        | 2.68  | 0.19 | 5 | 2.34  | 0.14 | 5 | 0.185        |
| B cells (CD45+, CD19+), x 10 <sup>6</sup>                                       | 25.22 | 1.34 | 5 | 31.76 | 2.00 | 5 | <b>0.027</b> |
| Natural killer cells (CD45+, NK1.1+), x 10 <sup>6</sup>                         | 2.82  | 0.22 | 5 | 2.62  | 0.23 | 5 | 0.544        |
| Myeloid cells (CD45+, CD11b+, CD11c+, x 10 <sup>6</sup>                         | 2.04  | 0.16 | 5 | 2.40  | 0.26 | 5 | 0.268        |
| Myeloid phagocytic cells (CD45+, CD11c+, MHCII/F4/80)+, x 10 <sup>6</sup>       | 1.46  | 0.10 | 5 | 1.18  | 0.06 | 5 | <b>0.039</b> |
| Neutrophils (CD45+, Gr-1+, CD11b+), x 10 <sup>6</sup>                           | 0.74  | 0.12 | 5 | 0.92  | 0.18 | 5 | 0.421        |
| Macrophages (CD45+, F4/80+, Gr-1-, CD11b+, x 10 <sup>6</sup>                    | 0.30  | 0.03 | 5 | 0.24  | 0.05 | 5 | 0.346        |

Table S6. Immune-cell subpopulations of male mouse bone marrow in B6NTac and B6JBom

| % Cell Population                                                                                | B6NTac |     |   | B6JBom |     |   | P value‡ |
|--------------------------------------------------------------------------------------------------|--------|-----|---|--------|-----|---|----------|
|                                                                                                  | Mean   | SEM | N | Mean   | SEM | N |          |
| Viable cells, %                                                                                  | 90.6   | 0.4 | 5 | 90.5   | 0.4 | 5 | 0.807    |
| CD45 <sup>pos</sup> immune cells, %                                                              | 54.8   | 2.3 | 5 | 48.4   | 2.9 | 5 | 0.117    |
| CD11b <sup>pos</sup> myeloid cells, %                                                            | 35.0   | 2.6 | 5 | 29.1   | 2.0 | 5 | 0.119    |
| Ly6G <sup>pos</sup> Ly6C <sup>low</sup> CD11b <sup>pos</sup> granulocytes, %                     | 23.2   | 1.9 | 5 | 18.9   | 1.5 | 5 | 0.113    |
| Ly6G <sup>neg</sup> Ly6C <sup>neg</sup> CD11b <sup>pos</sup> monocytes, %                        | 10.7   | 0.9 | 5 | 8.9    | 0.6 | 5 | 0.126    |
| F4/80 <sup>pos</sup> CD11b <sup>pos</sup> Ly6G <sup>neg</sup> macrophages&APC, %                 | 0.86   | 0.1 | 5 | 0.88   | 0.1 | 5 | 0.852    |
| CD19 <sup>pos</sup> B lymphocytes, %                                                             | 11.0   | 0.3 | 5 | 11.0   | 0.5 | 5 | 0.973    |
| lin <sup>neg</sup> CD45 <sup>pos</sup> hematopoietic stem/progenitor cells,* %                   | 2.2    | 0.1 | 5 | 2.0    | 0.1 | 5 | 0.176    |
| <hr/>                                                                                            |        |     |   |        |     |   |          |
| Total number of viable cells,† x 10 <sup>6</sup>                                                 | 48.2   | 3.7 | 5 | 45.2   | 3.6 | 5 | 0.579    |
| CD45 <sup>pos</sup> immune cells, x 10 <sup>6</sup>                                              | 26.4   | 2.1 | 5 | 21.5   | 1.3 | 5 | 0.087    |
| CD11b <sup>pos</sup> myeloid cells, x 10 <sup>6</sup>                                            | 16.7   | 1.7 | 5 | 12.9   | 0.8 | 5 | 0.076    |
| Ly6G <sup>pos</sup> Ly6C <sup>low</sup> CD11b <sup>pos</sup> granulocytes, x 10 <sup>6</sup>     | 11.1   | 1.1 | 5 | 8.4    | 0.5 | 5 | 0.051    |
| Ly6G <sup>neg</sup> Ly6C <sup>neg</sup> CD11b <sup>pos</sup> monocytes, x 10 <sup>6</sup>        | 5.2    | 0.6 | 5 | 4.0    | 0.3 | 5 | 0.12     |
| F4/80 <sup>pos</sup> CD11b <sup>pos</sup> Ly6G <sup>neg</sup> macrophages&APC, x 10 <sup>6</sup> | 0.41   | 0.0 | 5 | 0.4    | 0.0 | 5 | 0.885    |
| CD19 <sup>pos</sup> B lymphocytes, x 10 <sup>6</sup>                                             | 5.3    | 0.5 | 5 | 4.9    | 0.3 | 5 | 0.518    |
| lin <sup>neg</sup> CD45 <sup>pos</sup> hematopoietic stem/progenitor cells, x 10 <sup>6</sup>    | 1.1    | 0.1 | 5 | 0.9    | 0.1 | 5 | 0.115    |

\* - percent of HPC was found within CD45<sup>pos</sup> cells after gating out CD11b, CD19, Ly6G, Ly6C and F4/80 positive populations.

† - total number of cells from four bones (left and right legs)

‡ - unpaired  $t$  test
